# Supplementary material for: Alleviation of the effects of saline-alkaline stress on maize seedlings by regulation of active oxygen metabolism by Trichoderma asperellum
Source: PLoS One. 2017 Jun 27;12(6):e0179617. doi: 10.1371/journal.pone.0179617 (PMC5487032; doi:10.1371/journal.pone.0179617)
Supplement: S1 File — This file contains data including ion content, TBARS content, H2O2 content, O2- content, proline and soluble sugar, antioxidant enzyme activity, non-enzymatic antioxidants content. (XLSX) [file pone.0179617.s001.xlsx]

## Sheet: SOD
							SE
	Con1	Con2	A1	A2	A3			Con1	Con2	A1	A2	A3
X-leaf	238.675	397.684	277.384	325.711	351.62		X-leaf	11.5233	9.12608	14.6867	5.46678	9.73179
J-leaf	269.49	407.75	314.414	340.747	369.535		J-leaf	9.55325	9.99864	3.76604	13.607	11.8643
X-root	124.841	82.3501	140.31	193.918	211.753		X-root	14.4701	4.12256	14.1935	3.28476	8.81053
J-root	154.029	102.466	177	213.485	224.277		J-root	5.50649	5.03233	4.88972	5.74226	4.43996

## Sheet: CAT
								SE
		Con1	Con2	A1	A2	A3			Con1	Con2	A1	A2	A3
	X-leaf	170.093	130.186	153.002	160.703	163.5		X-leaf	0.838567	0.882046	1.20848	0.717144	0.757467
	J-leaf	181.523	149.068	160.833	171.616	176.51		J-leaf	0.762767	0.685629	4.61173	0.704672	0.543313
	X-root	118.585	61.8674	83.2014	98.2012	107.824		X-root	0.0798414	6.17655	8.66568	4.40945	0.942295
	J-root	132.222	74.4001	103.459	118.743	128.83		J-root	2.23407	7.8678	1.17335	0.991464	2.03225

## Sheet: APX
							SE
	Con1	Con2	A1	A2	A3			Con1	Con2	A1	A2	A3
X-leaf	8.48695	29.1399	13.2512	20.2744	25.5214		X-leaf	0.895641	1.70327	1.89804	1.29145	1.46742
J-leaf	11.0543	33.9145	17.4063	22.9479	27.7945		J-leaf	1.22332	0.738784	1.62768	1.11311	1.83853
X-root	27.3565	16.6348	35.3102	40.8131	46.3381		X-root	1.90475	0.866742	5.90953	1.31421	1.59354
J-root	32.5283	23.1174	37.7337	44.7858	53.0049		J-root	4.54762	0.368565	0.919436	2.06462	0.56604

## Sheet: GPX
								SE
		Con1	Con2	A1	A2	A3			Con1	Con2	A1	A2	A3
	X-leaf	25.7258	50.1453	31.5668	36.2142	42.2526		X-leaf	5.70161	0.888812	2.2639	1.64704	1.35327
	J-leaf	29.733	53.5244	33.8264	40.9374	47.1674		J-leaf	3.92434	2.10833	4.83602	1.24974	1.63469
	X-root	40.1757	28.4323	50.6149	57.9462	65.121		X-root	6.12503	0.395257	1.99358	1.21141	1.43948
	J-root	47.6515	36.9493	57.0807	64.012	70.0573		J-root	5.36133	0.519624	3.12631	1.29224	1.745

## Sheet: GR
								SE
		Con1	Con2	A1	A2	A3			Con1	Con2	A1	A2	A3
	X-leaf	1.13288	4.01466	1.73045	2.33081	2.93489		X-leaf	0.46018	0.155712	0.0981782	0.312034	0.372954
	J-leaf	1.62059	4.95108	2.31924	2.9557	3.89626		J-leaf	0.395684	0.329575	0.273131	0.564969	0.251089
	X-root	5.00216	2.42832	5.42976	6.61741	7.80394		X-root	0.826546	0.326372	0.22809	0.367091	0.115513
	J-root	6.26727	3.1084	6.66226	7.77443	9.15997		J-root	0.372998	0.618811	0.17901	0.650983	0.252674

## Sheet: POD
							SE
	Con1	Con2	A1	A2	A3			Con1	Con2	A1	A2	A3
X-leaf	5.11936	8.8348	6.50449	7.12859	8.08757		X-leaf	0.180581	0.0507875	0.496599	0.435629	0.301254
J-leaf	6.3575	9.38001	7.09468	7.47771	8.4887		J-leaf	0.938477	0.0740524	0.246041	0.183543	0.628544
X-root	28.9001	11.0479	15.9466	22.2142	25.9991		X-root	0.833217	0.514499	0.201376	1.06739	0.73054
J-root	30.0343	13.0146	18.3946	23.1739	27.4793		J-root	0.893593	0.978559	0.992614	0.38217	0.406538

## Sheet: ASA
Leaf ASA／DHA								SE
	Con1	Con2	3	6	9				Con1	Con2	3	6	9
X	0.353869	3.15124	0.505339	0.849675	1.46195			X	0.0118734	0.0409623	0.0331637	0.0100288	0.0354122
J	0.425679	3.35356	0.709242	0.980622	1.62176			J	0.00789819	0.233108	0.0362893	0.0173312	0.0173848
Root ASA／DHA								SE
	Con1	Con2	3	6	9				Con1	Con2	3	6	9
X	3.28322	13.7985	4.69898	6.28937	11.8357			X	0.147723	0.66575	0.532149	0.724553	0.138874
J	4.2611	17.9389	5.81477	7.37675	12.7993			J	0.0893642	0.700651	0.501175	0.750388	0.907278
Leaf ASA＋DHA	Con1	Con2	3	6	9			SE	Con1	Con2	3	6	9
X	6.46186	5.35404	7.21662	10.2445	15.5127			X	0.0715786	0.100536	0.14185	0.143012	0.220377
J	7.1872	5.89874	8.8219	12.7456	17.0633			J	0.0622541	0.0376762	0.172126	0.126213	0.358703
Root ASA＋DHA	Con1	Con2	3	6	9			SE	Con1	Con2	3	6	9
X	4.86662	3.88018	6.04856	6.93675	11.6177				0.0693372	0.050763	0.0380795	0.0619431	0.108571
J	5.63129	4.83131	6.82545	8.02756	13.1119				0.0907002	0.0882651	0.121553	0.164625	0.115841

## Sheet: GSH
Leaf gssg+gsh	Con1	Con2	3	6	9		SE	Con1	Con2	3	6	9
X	534.844	509.965	589.017	620.501	654.927		X	1.6712	6.32293	6.2101	10.4062	9.37318
J	543.443	517.778	598.139	634.134	664.735		J	6.20416	6.77557	2.83755	7.26785	6.07542
							SE
root gssg+gsh	Con1	Con2	3	6	9			Con1	Con2	3	6	9
X	585.977	550.341	640.15	671.633	706.059		X	1.9616	5.16141	6.08755	9.81062	10.3948
J	601.114	568.911	649.271	685.266	715.867		J	7.71805	7.35796	2.16073	7.48392	5.30841
leaf gsh/gssg
	Con1	Con2	3	6	9		SE	Con1	Con2	3	6	9
X	2.04646	5.71743	4.42238	4.91616	5.60899		X	0.0441315	0.0522382	0.200343	0.0507052	0.0603775
J	2.19805	5.93977	4.60069	5.26686	5.78748		J	0.0686786	0.0276695	0.169023	0.088127	0.066163
root gsh/gssg							SE
	Con1	Con2	3	6	9			Con1	Con2	3	6	9
X	3.15523	7.54527	5.36184	6.19502	7.07655		X	0.119969	0.113096	0.194689	0.17911	0.182694
J	3.58231	8.04471	5.66253	6.555	7.49104		J	0.195585	0.309842	0.0655214	0.204632	0.106737

## Sheet: TBARS
								SE
		Con1	Con2	A1	A2	A3			Con1	Con2	A1	A2	A3
	X-leaf	15.432	5.1959	10.6251	9.55136	7.59661		X-leaf	0.319	0.654553	0.289319	0.846072	0.458992
	J-leaf	13.0083	4.81467	9.73636	9.30868	6.974		J-leaf	0.771062	0.471654	0.212539	0.481029	0.734856
	X-root	8.24915	3.4684	6.83378	5.65927	4.21438		X-root	0.27846	1.00466	0.793182	0.626049	0.983611
	J-root	7.08793	3.11367	5.83394	5.37585	4.05927		J-root	0.145683	0.88377	0.292576	0.171734	0.536414

## Sheet: O2·- content
O2·-
								SE
	Con1	Con2	A1	A2	A3				Con1	Con2	3	6	9
X-leaf	67.9143	18.2684	43.9965	36.6342	24.7328			X-leaf	0.611321	0.411887	1.51129	1.45629	0.485799
J-leaf	60.9592	17.2041	40.5057	34.5135	23.536			J-leaf	1.42682	0.377739	0.648734	0.799362	0.18438
X-root	27.2516	7.95537	19.0156	15.6802	12.0371			X-root	0.580375	0.178178	0.386175	0.711182	0.29956
J-root	24.2676	7.233	18.0776	14.437	10.8953			J-root	0.81279	0.529666	0.208909	0.523582	0.507233

[truncated: 4 more sheets: H2O2, Proline, Soluble sugar, Ion content]
